# Supplementary material for: Highly efficient ethylene polymerisation by scandium alkyls supported by neutral fac-κ3coordinated N3donor ligands
Source: Royal Society of Chemistry journal article supplement (doi:10.1039/b310867h), 2003-01-01

Highly efficient ethylene polymerisation by scandium alkyls supported by neutral *fac*-3 coordinated N3 donor ligands

**Sally C. Lawrence, Benjamin D. Ward,Stuart R. Dubberley,Christopher M. Kozak and Philip Mountford**

______________________________________________________________________________________

Supporting information: syntheses and characterising data

______________________________________________________________________________________

**[Sc(Me3[9]aneN3)(CH2SiMe3)3] (1)**

[Sc(CH2SiMe3)3(THF)2] (152 mg, 0.34 mmol) was dissolved in cold (7 C) benzene (15 ml) and stirred for the dropwise addition of a solution of Me3[9]aneN3 (58 mg, 0.34 mmol) in benzene (15 ml). The reaction was allowed to warm to rt and stirred for 30 min. The volatiles were removed under reduced pressure to afford 44 as a pale yellow solid. Yield 94 mg (59%).

1H NMR data: (C6D6, 500.0 MHz, 293 K): 2.32 (9 H, s, NMe), 2.26 (6 H, m, NCHH), 1.56 (6 H, m, NCHH), 0.42 (27 H, s, SiMe3), -0.23 (6 H, s, CH2SiMe3). 13C{1H} NMR data: (C6D6, 125.7 MHz, 293 K): 53.6 (NCH2CH2N), 48.1 (NMe), 2.5 (SiMe3) [not observed CH2SiMe3]. Anal. found (calcd for C21H54N3ScSi3): C 50.3 (52.8), H 11.2 (11.4), N 8.5 (8.8) % FI-HRMS for [Sc(Me3[9]aneN3)(CH2SiMe3)2]+: Anal. found (calcd. for C17H43N3ScSi2): *m/z* = 390.2561 (390.2555). IR data: (KBr pellet, cm-1): 2940 (s), 2894 (s), 2860 (s), 2822 (m), 1494 (m), 1464 (s), 1424 (w), 1384 (w), 1366 (m), 1300 (m), 1246 (s), 1234 (s), 1206 (w), 1154 (w), 1126 (w), 1080 (m), 1068 (m), 1008 (s), 876 (s), 852 (s), 818 (s), 774 (w), 748 (m), 720 (m), 666 (m), 604 (w), 578 (w), 450 (m), 420 (w), 402 (w).

**[Y(Me3[9]aneN3)(CH2SiMe3)3] (2)**

[Y(CH2SiMe3)3(THF)2] (290 mg, 0.587 mmol) was dissolved in cold (7 C) benzene (15 ml) and stirred for the dropwise addition of a solution of Me3[9]aneN3 (101 mg, 0.587 mmol) in benzene (15 ml). The reaction was allowed to warm to rt and stirred for 30 min. The volatiles were removed under reduced pressure to afford [Y(Me3[9]aneN3)(CH2SiMe3)3] **2** as a white solid. Yield: 207 mg (68%).

1H NMR data (C6D6, 500.0 MHz, 293 K): 2.30 (9 H, s, NMe), 2.20 (6 H, m, NCH2), 1.56 (6 H, m, NCH2), 0.41 (27 H, s, SiMe3), -0.67 (6 H, d, YCH2, 2*J* (YH) = 2.6 Hz) ppm. 13C{1H} NMR data (C6D6, 125.7 MHz, 293 K): 54.4 (NCH2), 47.8 (NMe), 35.3 (YCH2, 1*J* (YC) = 36 Hz), 4.9 (SiMe3) ppm. Anal. found (calcd. for C21H54N3Si3Y): C, 40.4 (48.3); H, 8.4 (10.4); N, 8.5 (8.1)%. The poor elemental analysis is attributed to incomplete combustion and formation of carbides. IR data (KBr pellet): 2822 (s), 1492 (m), 1464 (s), 1366 (m), 1302 (w), 1246 (m), 1234 (m), 1208 (w), 1154 (w), 1128 (w), 1068 (m), 1008 (s), 858 (s), 818 (m), 744 (m), 716 (m), 668 (m), 572 (w), 572 (w), 424 (w), 408 (w) cm-1.

**[Sc{HC(Me2pz)3}(CH2SiMe3)3] (3)**

To a yellow solution of [Sc(CH2SiMe3)3(THF)2] (0.100 g, 0.24 mmol) in benzene (10 ml) was added a solution of HC(Me2pz)3 (0.070 g, 0.24 mmol) in benzene (5 ml) to give an orange solution. After stirring at rt for 4 h the volatiles were removed under reduced pressure to give an orange solid which was washed with benzene (2 x 10 ml) afording [Sc(CH2SiMe3)3{HC(Me2pz)3}] as a pale orange solid. Yield: 0.09 g (65 %).

1H NMR data (C6D6, 500.0 MHz, 298 K): 7.03 (1H, s, HC(Me2pz)3), 5.21 (3H, s, 4-N2C3Me2H), 2.66 (9H, s, 5-N2C3Me2H), 1.35 (9H, s, 3-N2C3Me2H), 0.60 (6H, s, CH2SiMe3), 0.27 (27H, s, SiMe3). 13C-{1H} NMR data (C6D6, 500.0 MHz, 298 K): 154.2 (5-N2C3Me2H), 137.7 (3-N2C3Me2H), 107.8 (4-N2C3Me2H), 67.5 (HC(Me2pz)3), 38.2 (CH2SiMe3), 16.3 (5-N2C3Me2H), 10.2 (3-N2C3Me2H), 4.8 (SiMe3). IR data (NaCl plates, Nujol, cm-1): 1562(w), 1412(w), 1321(w), 1261(s), 1093(s), 1021(s), 863(w), 863(w), 801(s), 701(w). Anal. found (calcd. for C28H55N6ScSi3): C, 50.3 (55.6); N, 13.7 (13.9); H, 7.7 (9.2) %. The very poor elemental analysis is attributed to incomplete combustion and formation of carbides and/or nitrides.

**[Y{HC(Me2pz)3}(CH2SiMe3)3] (4)**

To a colourless solution of [Y(CH2SiMe3)3(THF)2] (0.370 g, 0.74 mmol) in benzene (10 ml) was added a solution of HC(Me2pz)3 (0.220 g, 0.74 mmol) in benzene (10 ml). The resulting dark brown solution was allowed to stir at rt for 1 h. The volume of the solution was reduced to 10 ml and hexane (30 ml) was added resulting in the formation of a brown precipitate which was filtered. The resulting solid was re-extracted into benzene (10 ml) and addition of hexane (20 ml) afforded [Y{HC(Me2pz)3}(CH2SiMe3)3] as a light brown solid. Yield: 0.28 g (58 %).

1H NMR data (C6D6, 500.0 MHz, 298 K): 6.99 (1H, s, HC(Me2pz)3), 5.18 (3H, s, 4-N2C3Me2H), 2.61 (9H, s, 3-N2C3Me2H), 1.32 (9H, s, 5-N2C3Me2H), 0.33 (27H, d, 4J[1H-89Y] = 0.7 Hz, SiMe3), -0.02 (6H, d, 3J[1H-89Y] = 2.8 Hz, CH2SiMe3). 13C-{1H} NMR data (CD2Cl2, 125.7 MHz, 298 K): 154.3 (3-N2C3Me2H), 138.5 (5-N2C3Me2H), 107.6 (3-N2C3Me2H), 67.9 (HC(Me2pz)3), 32.4 (CH2SiMe3), 15.7 (3-N2C3Me2H), 10.2 (5-N2C3Me2H), 5.0 (SiMe3). IR data (NaCl plates, Nujol, cm-1): 2360(m), 2342(w), 1959(w), 1618(w), 1562(w), 1459(m), 1413(w), 1261(s), 1093(s), 1020(s), 863(w), 800(s), 705(w), 669(w). Anal. found (calcd. for C28H55N6Si3Y): C, 49.9 (51.8); H, 7.9 (8.5); N, 12.3 (13.0) %.

**[Sc{HC(Me2pz)3}(O-2,6-C6H3Me2)3] (5)**

To a pale orange solution of [Sc{HC(Me2pz)3}(CH2SiMe3)3] **3** (0.110 g, 0.18 mmol) in THF (10 ml) was added a solution of 2,6-dimethylphenol (0.060 g, 0.53 mmol) in THF (10 ml) at rt. The mixture was allowed to stir at rt for 2 h and the volume was reduced to 5 ml. Pentane (15 ml) was added and a white solid formed. Filtration afforded [Sc{HC(Me2pz)3}(O-2,6-C6H3Me2)3] as a white solid. Yield: 0.10 g (81 %).

1H NMR data (CD2Cl2, 500.0 MHz, 253 K): 7.88 (1H, s, HC(Me2pz)3), 6.83 (2H, d, 3J = 7.1 Hz*m*-OC6H3Me2 "down"), 6.63 (2H, d, 3J = 7.1 Hz, *m*-OC6H3Me2 "up"), 6.34 (1H, apparent t, apparent 3J = 7.1 Hz, *p*-OC6H3Me2), 5.87 (3H, s, 4-N2C3Me2H), 2.54 (9H, s, 5-N2C3Me2H), 2.48 (9H, s, OC6H3Me2 "down"), 1.88 (9H, s, 3-N2C3Me2H), 1.19 (9H, s, OC6H3Me2 "up"). 13C-{1H} NMR data (CD2Cl2, 125.7 MHz, 253 K): 162.5 (*ipso*-OC6H3Me2), 155.1 (3-N2C3Me2H), 138.4 (5-N2C3Me2H), 127.6 (*o*-OC6H3Me2 "down"), 127.4 (*o*-OC6H3Me2 "up"), 114.9 (*p*-OC6H3Me2), 108.1 (4-N2C3Me2H), 67.2 (HC(Me2pz)3), 18.4 (OC6H3Me2 "down"), 16.3 (OC6H3Me2 "up"), 12.9 (3-N2C3Me2H), 11.0 (5-N2C3Me2H). IR data (NaCl plates, Nujol, cm-1): 2852(s), 2316(w), 1590(m), 1563(m), 1378(m) 1304(m), 1260(s), 1238(w), 1092(m), 1042(w), 867(w), 800(m). Anal. found (calcd. for C40H49N6O3Sc): C, 68.0 (68.0); N, 11.8 (11.9); H, 6.9 (7.0) %. FI+ MS: *m/z* = 706 [M]+, 10%.

*Crystal data for****5·4(C6H6)***: C40H49N6O3Sc·4(C6H6), *M* = 1019.29, trigonal, *P 3 1 c*, *a* = 14.7505(6), *c* = 15.4170(4) Å, *U* = 2905.0(2) Å3, *Z* = 2, *T* = 150 K,  = 0.18 mm-1, 7816 independent reflections (*R*merge = 0.02), 4925 [*I* > 3(*I*)] used in refinement, final *R* indices: *R* = 0.0507, *R*w = 0.0557.


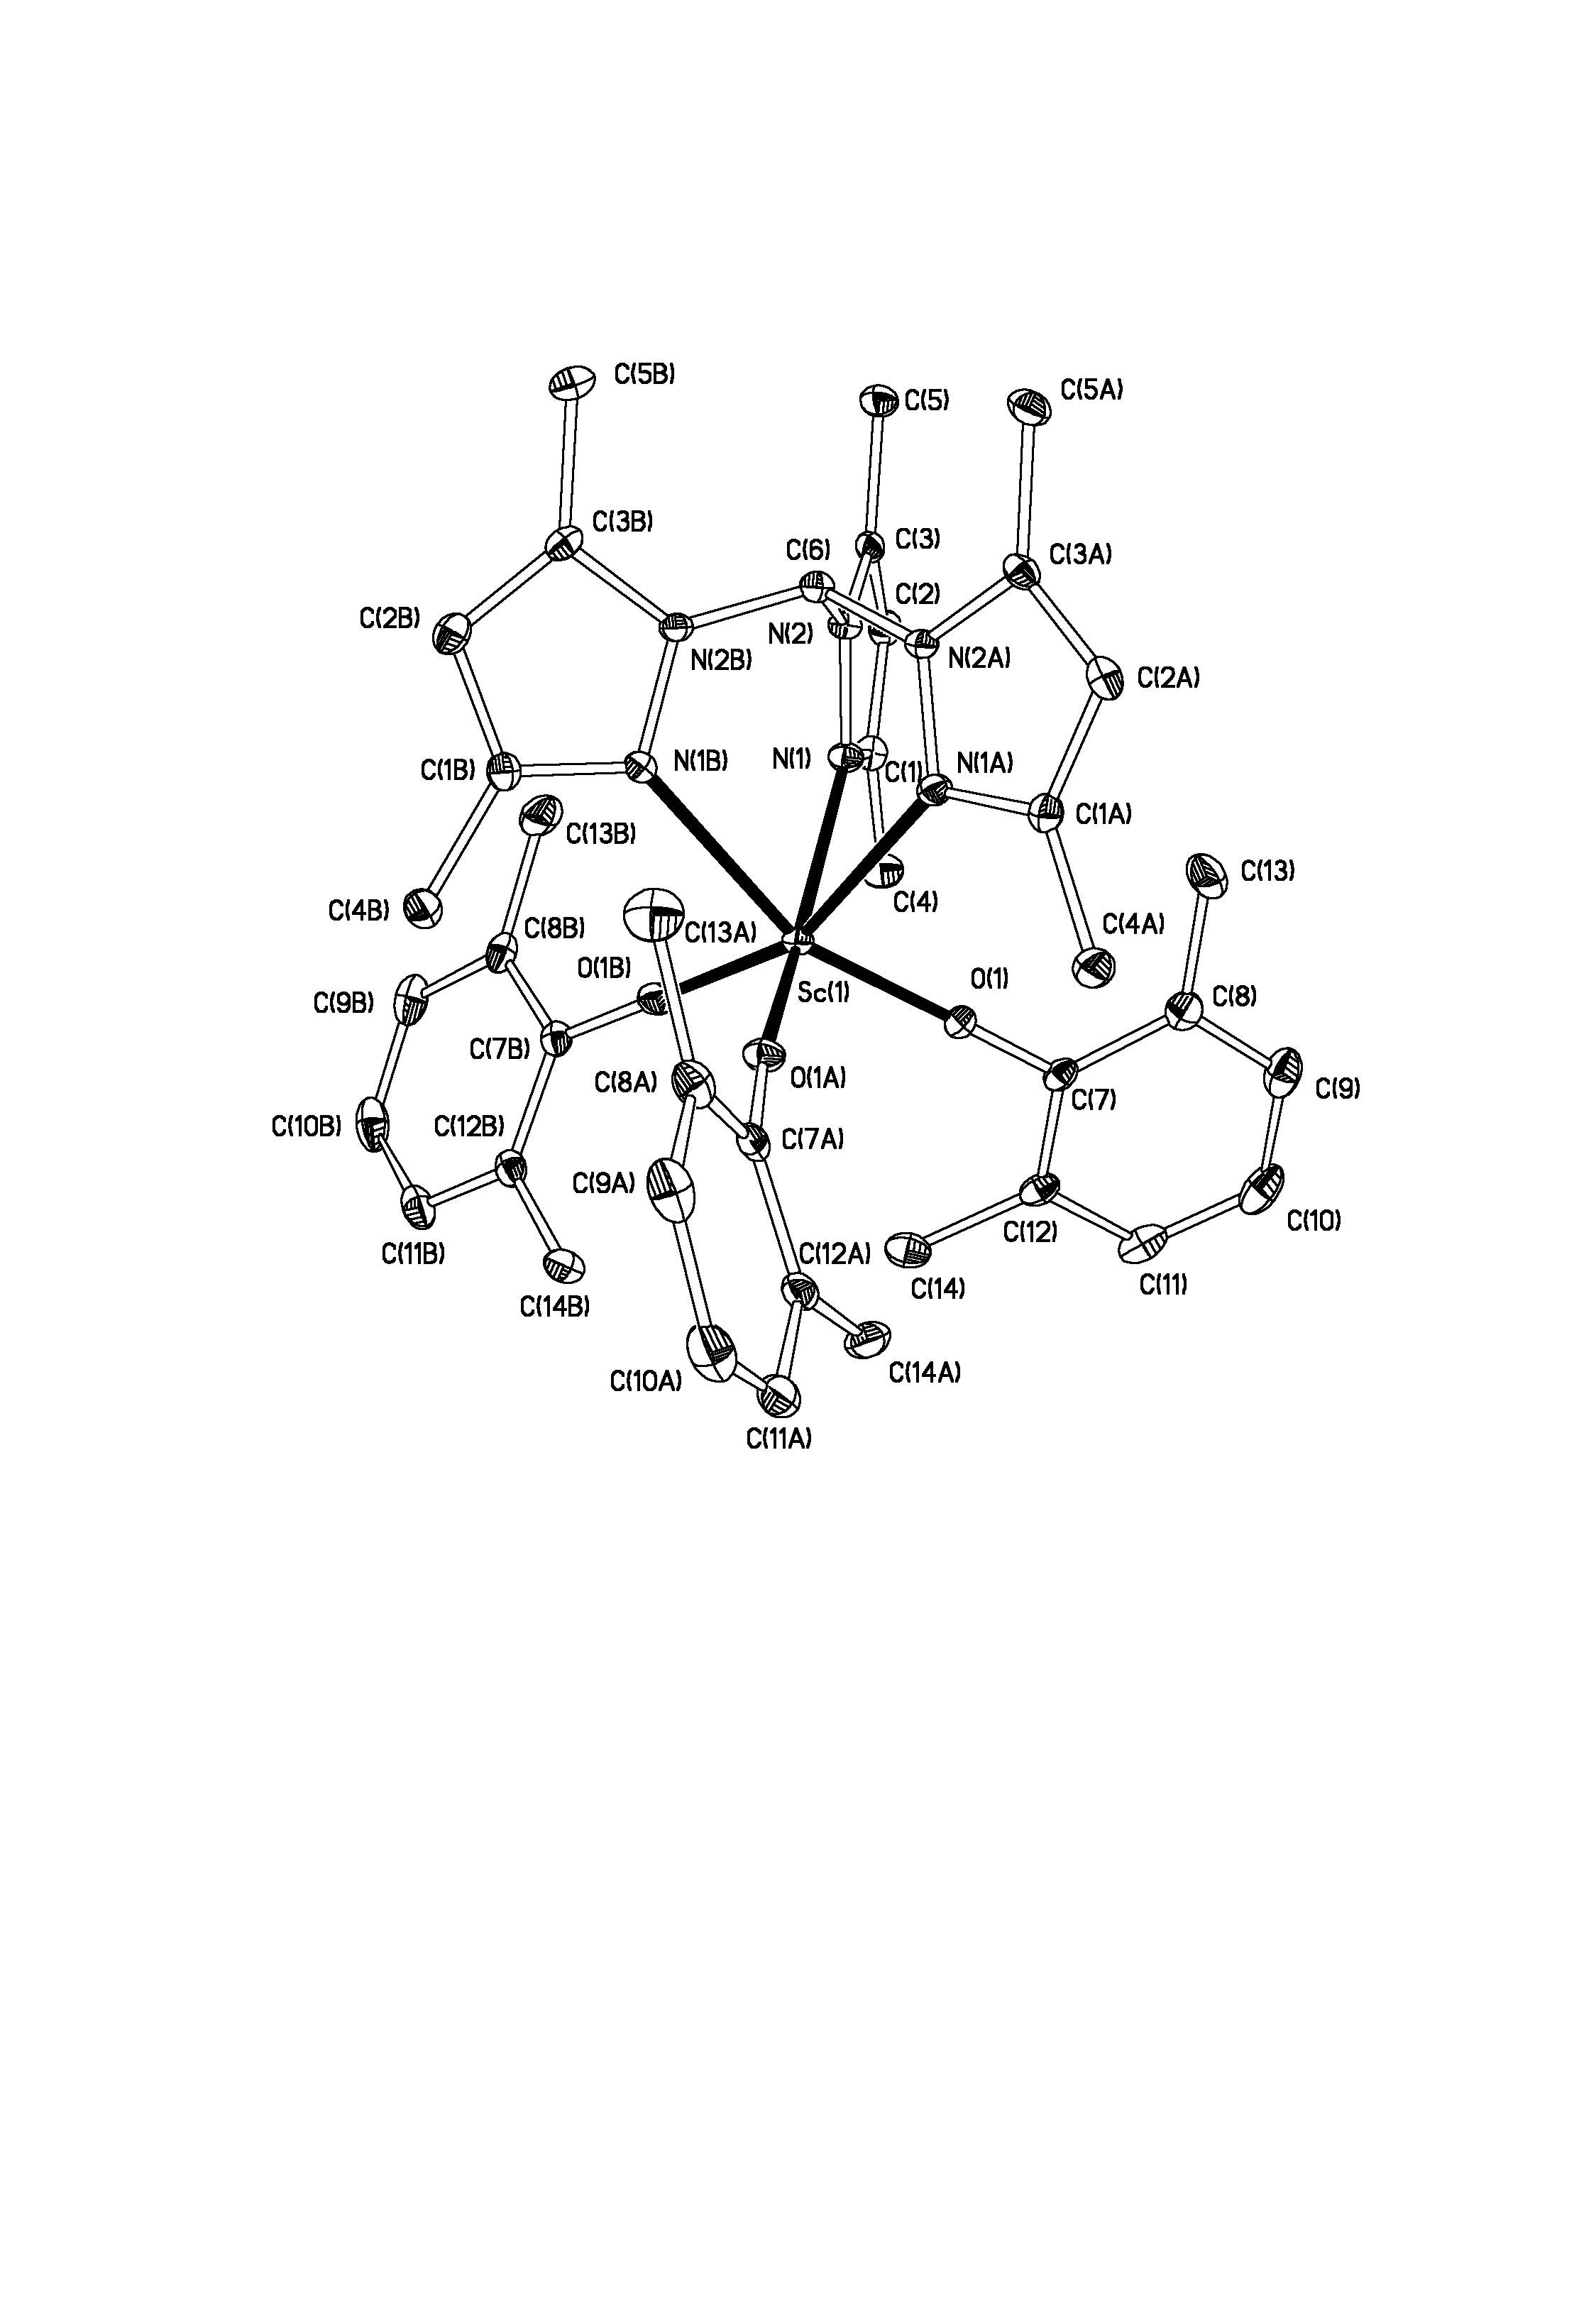


**Figure:** Displacement ellipsoid plot (25%) of [Sc(O-2,6-C6H3Me2)3{HC(Me2pz)3}] **5**. H atoms and benzene molecules of crystallisation omitted for clarity. Selected parameters: Sc(1) - O(1) 1.9615(16), Sc(1) - N(1) 2.3543(19) Å; Sc(1) - O(1) - C(7) 174.41(17); O(1) - Sc(1) - O(1A) 103.74(6) o.

**[Sc{HC(Me2pz)3}Cl3] (6)**

A suspension of ScCl3 (0.057 g, 0.38 mmol) in THF (10 ml) was refluxed for 10 min to give a colourless solution which was allowed to cool. To this was added a yellow solution of HC(Me2pz)3 (0.110 g, 0.38 mmol) in THF (10 ml) and the mixture was stirred at rt for 4 h The resultant white solid was filtered away from the colourless solution and dried to afford [Sc{HC(Me2pz)3}Cl3]. Yield: 0.13 g (74 %).

1H NMR data (CD2Cl2, 500.0 MHz, 298 K): 7.91 (1H, s, HC(Me2pz)3), 6.09 (3H, s, 4-N2C3Me2H), 2.72 (9H, s, 5-N2C3Me2H), 2.54 (9H, s, 3-N2C3Me2H). 13C-{1H} NMR data (CD2Cl2, 125.5 MHz, 298 K): 158.6 (5-N2C3Me2H), 142.2 (3-N2C3Me2H), 111.0 (4-N2C3Me2H), 70.2 (HC(Me2pz)3) 17.5 (5-N2C3Me2H), 13.3 (3-N2C3Me2H). IR data (NaCl plates, Nujol, cm-1): 1619(w), 1563(m), 1413(w), 1305(w), 1261(m), 1065(m), 1044(m), 910(w), 862(w), 706(w), 407(w). Anal. found (calcd. for C16H22N6ScCl3·1.1(THF)): C, 46.2 (46.3); N, 15.7 (15.9); H, 6.4 (5.9) %; EI+ MS: *m/z* = 413 [M-Cl]+, 60%

**[Y{HC(Me2pz)3}Cl3] (7)**

To a suspension of YCl3 (0.048 g, 0.25 mmol) in THF (10 ml) was added a solution of HC(Me2pz)3 (0.080 g, 0.25 mmol) in THF (10 ml) at rt. The mixture was stirred at rt for 16 h resulting in a white precipitate and yellow supernatant. Filtration afforded [Y{HC(Me2pz)3}Cl3] as a white solid. Yield: 0.09 g (74 %).

1H NMR data (CD2Cl2, 500.0 MHz, 298 K): 7.91 (1H, s, HC(Me2pz)3), 6.08 (3H, s, 4-N2C3Me2H), 2.65 (9H, s, 3-N2C3Me2H), 2.52 (9H, s, 5-N2C3Me2H). 13C-{1H} NMR data (CD2Cl2, 125.7 MHz, 298 K): 156.1 (3-N2C3Me2H), 140.9 (5-N2C3Me2H), 108.7 (4-N2C3Me2H), 67.9 (HC(Me2pz)3), 14.0 (3-N2C3Me2H), 10.5 (5-N2C3Me2H). IR data (NaCl plates, Nujol, cm-1): 1562(m), 1413(m), 1304(m), 1261(m), 1064(m), 1042(m), 905(m), 861(m), 801(m), 706(m). Anal. found (calcd. for C16H22Cl3N6Y·1.1(THF)): C, 42.7 (42.8); N, 14.8 (14.7); H, 5.7 (5.4) %, EI+ MS: *m/z* = 456 [M - Cl- H]+, 70 %; 457 [M - Cl]+, 50 %.

**[Sc{HC(Me2pz)3}(CH2SiMe3)2(THF)][B(C6F5)4] (8)**

To a colourless solution of [Sc{HC(Me2pz)3}(CH2SiMe3)3] **3** (0.10 g, 0.17 mmol) in CH2Cl2 (10 ml) was added THF (2 equiv., 0.34 mmol) and a yellow solution of [Ph3C][BArF4] (0.15 g, 0.17 mmol) in CH2Cl2 (5 ml). The reaction mixture immediately turned red and was allowed to stir at rt for 1 h after which time it had become pale orange. Removal of the volatiles under reduced pressure gave a sticky orange solid which was triturated with hexane (5 x 10 ml) affording [Sc(CH2SiMe3)2(THF){HC(Me2pz)3}][B(C6F5)4] as an pale solid with some organic side product Ph3CCH2SiMe3 present by 1H NMR.

1H NMR data (CD2Cl2, 500.0 MHz, 298 K): 7.90 (1H, s, HC(Me2pz)3), 6.19 (1H, s, 4-N2C3Me2H trans to THF), 6.08 (2H, s, 4-N2C3Me2H trans to CH2SiMe3), 4.24 (4H, m, OCH2CH2), 2.76 (3H, s, 3-N2C3Me2H trans to THF), 2.60 (3H, s, 5-N2C3Me2H trans to THF), 2.54 (6H, s, 5-N2C3Me2H trans to CH2SiMe3), 2.37 (6H, s, 3-N2C3Me2H trans to CH2SiMe3), 2.16 (4H, m, OCH2CH2), 0.33 (2H, d, 3J = 11.9 Hz, CH2SiMe3), 0.13 (2H, d, 3J = 11.9 Hz, CH2SiMe3), -0.23 (18H, s, SiMe3). 19F NMR data (CD2Cl2, MHz, 298 K): -133.5 (d, *o*-C6F5), -164.1 (t, *m*-C6F5), -168.0 (t, *p*-C6F5). 13C-{1H} NMR data (CD2Cl2, 125.5 MHz, 298 K): 155.5 (3-N2C3Me2H *trans* to THF), 154.5 (3-N2C3Me2H *trans* to CH2SiMe3), 141.6 (5-N2C3Me2H *trans* to CH2SiMe3), 141.4 (5-N2C3Me2H *trans* to THF), 109.1 (4-N2C3Me2H *trans* to CH2SiMe3), 108.9 (4-N2C3Me2H *trans* to THF), 73.3 (OCH2CH2), 68.1 (HC(Me2pz)3), 25.8 (OCH2CH2), 16.4 (3-N2C3Me2H *trans* to THF), 15.1 (3-N2C3Me2H *trans* to CH2SiMe3), 11.5 (5-N2C3Me2H *trans* to THF), 11.3 (5-N2C3Me2H *trans* to CH2SiMe3), 3.5 (SiMe3). (13C resonances for the anion appeared as broad complex multiplets). IR data (NaCl plates, Nujol, cm-1): 1644(m), 1568(w), 1514(m), 1305(w), 1262(w), 1086(m), 979(m), 860(m), 707(m). ES+ MS: *m/z* = 433 [M - C4H8O - CH2SiMe3]+, 10 %. An elemental analysis was not obtained for this compound due to obvious contamination by the Ph3CCH2SiMe3 organic side-product.

**GPC data for the polyethylenes**


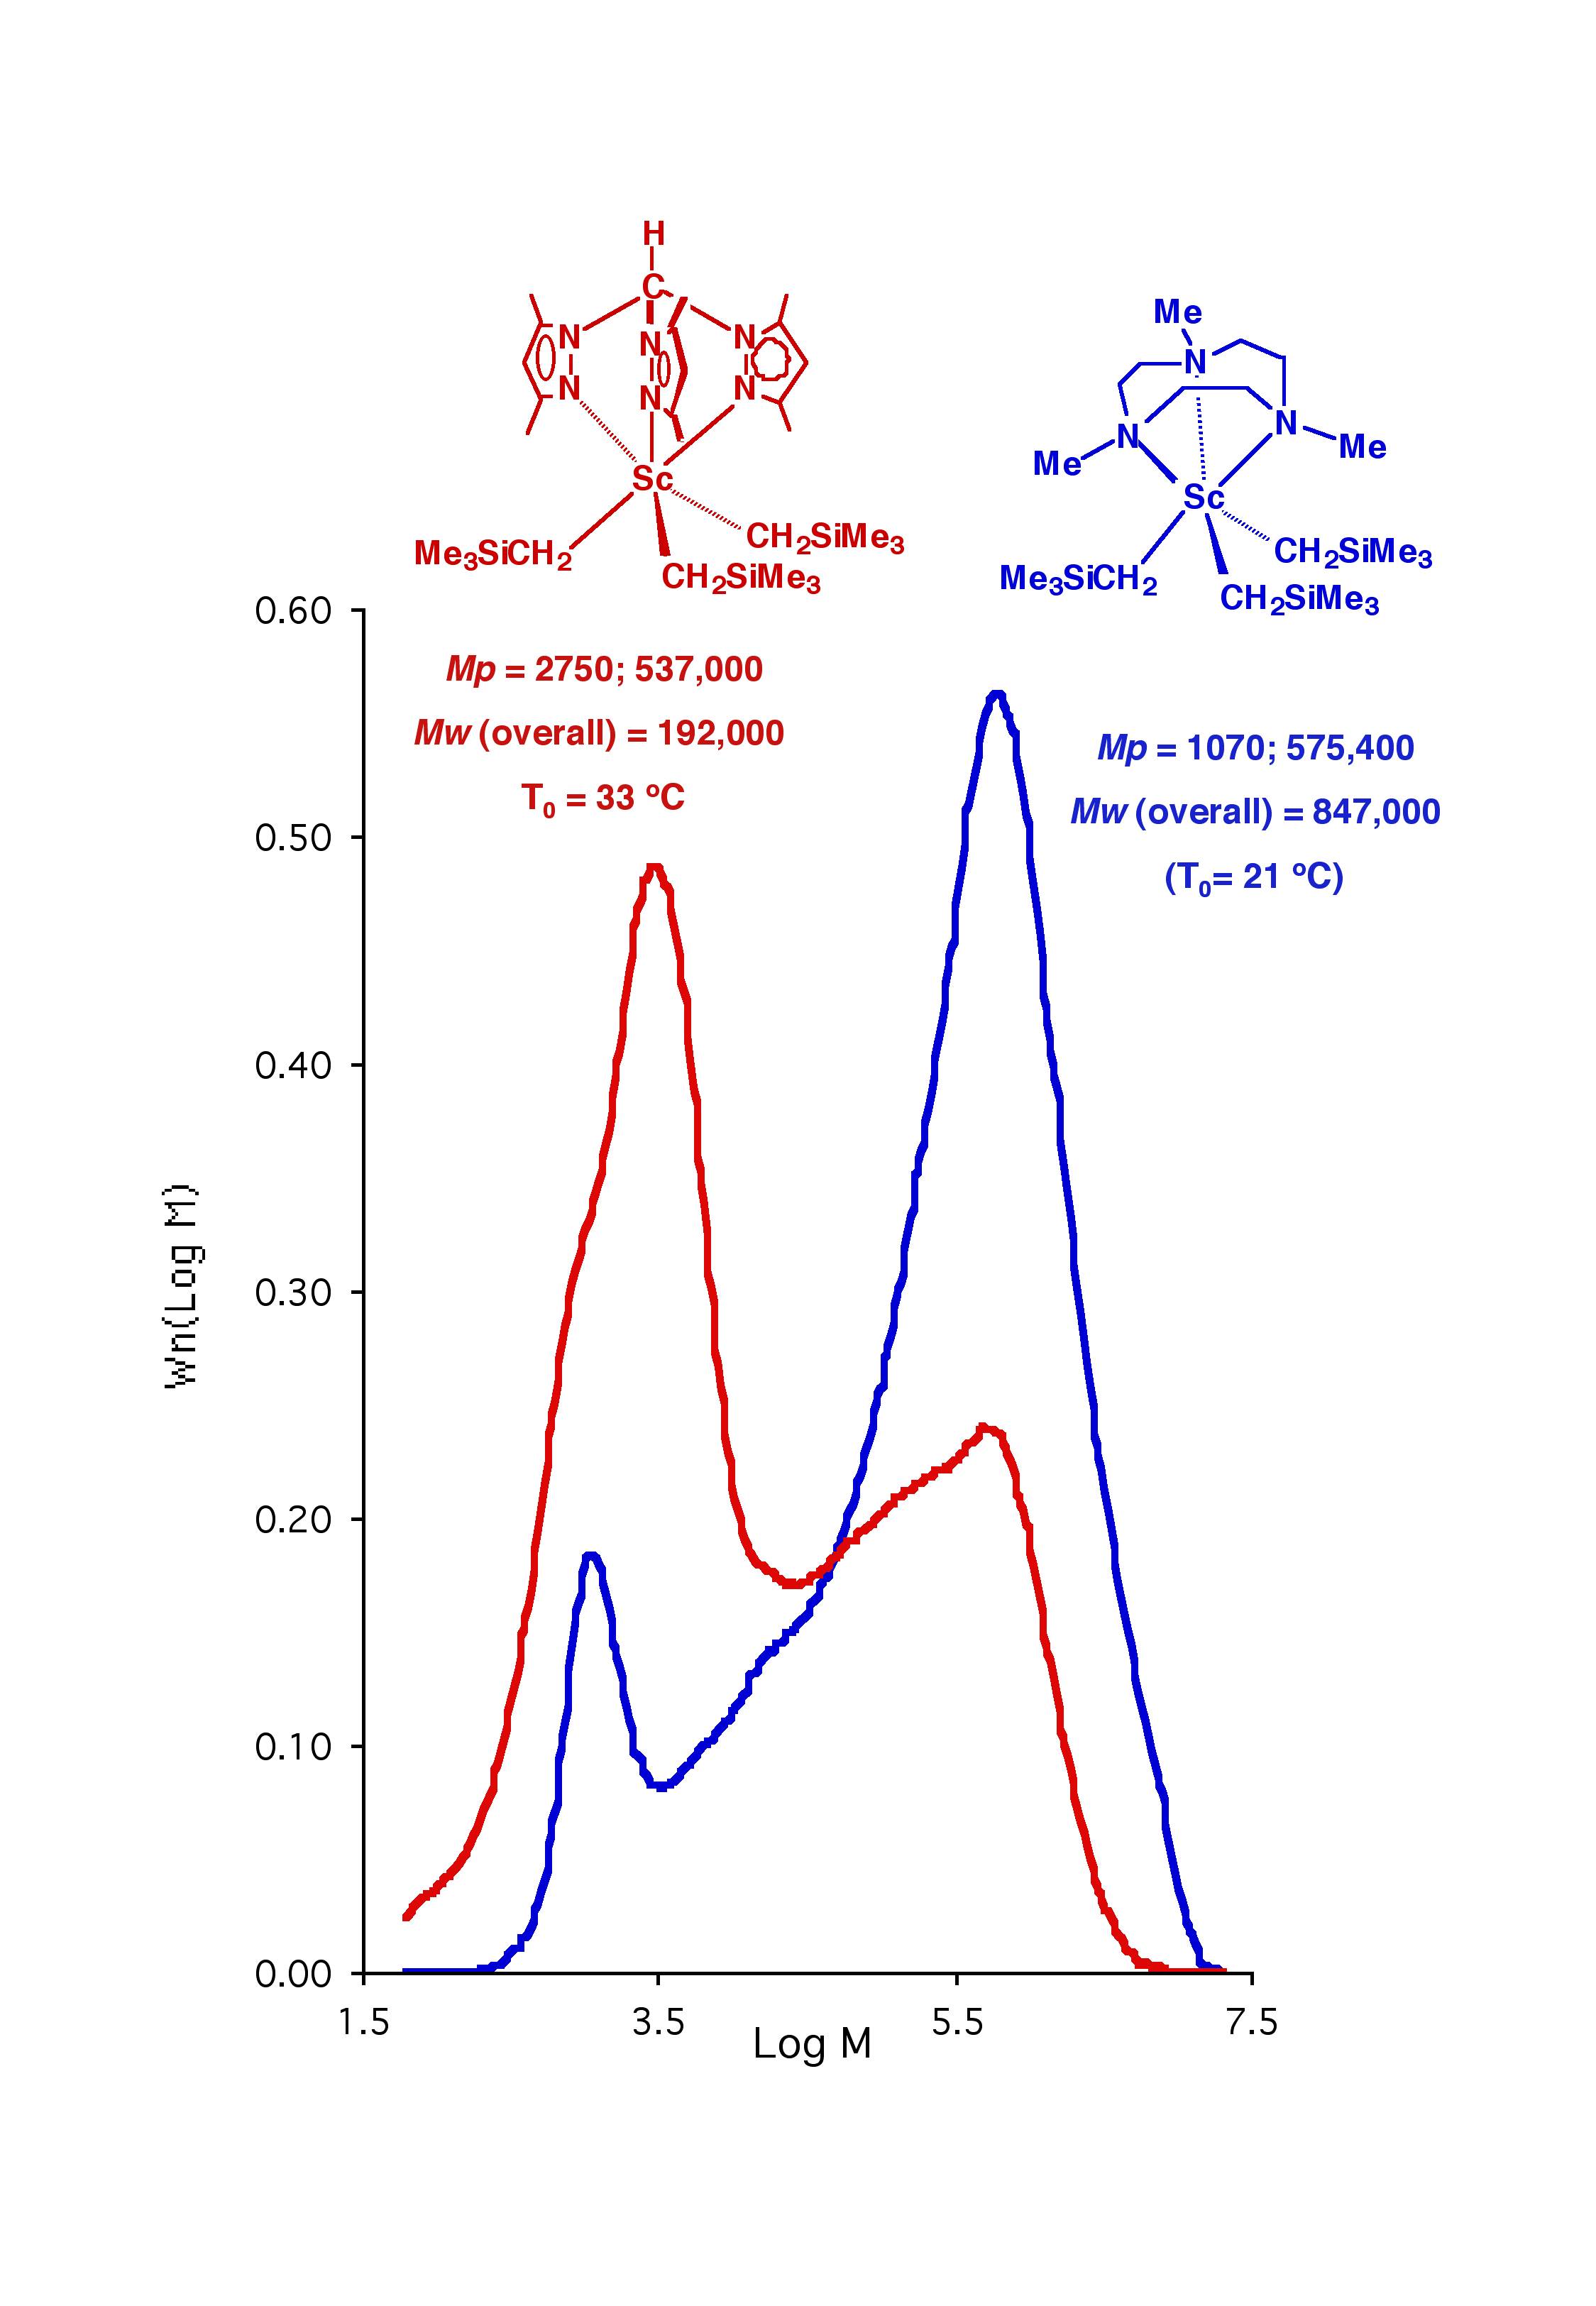

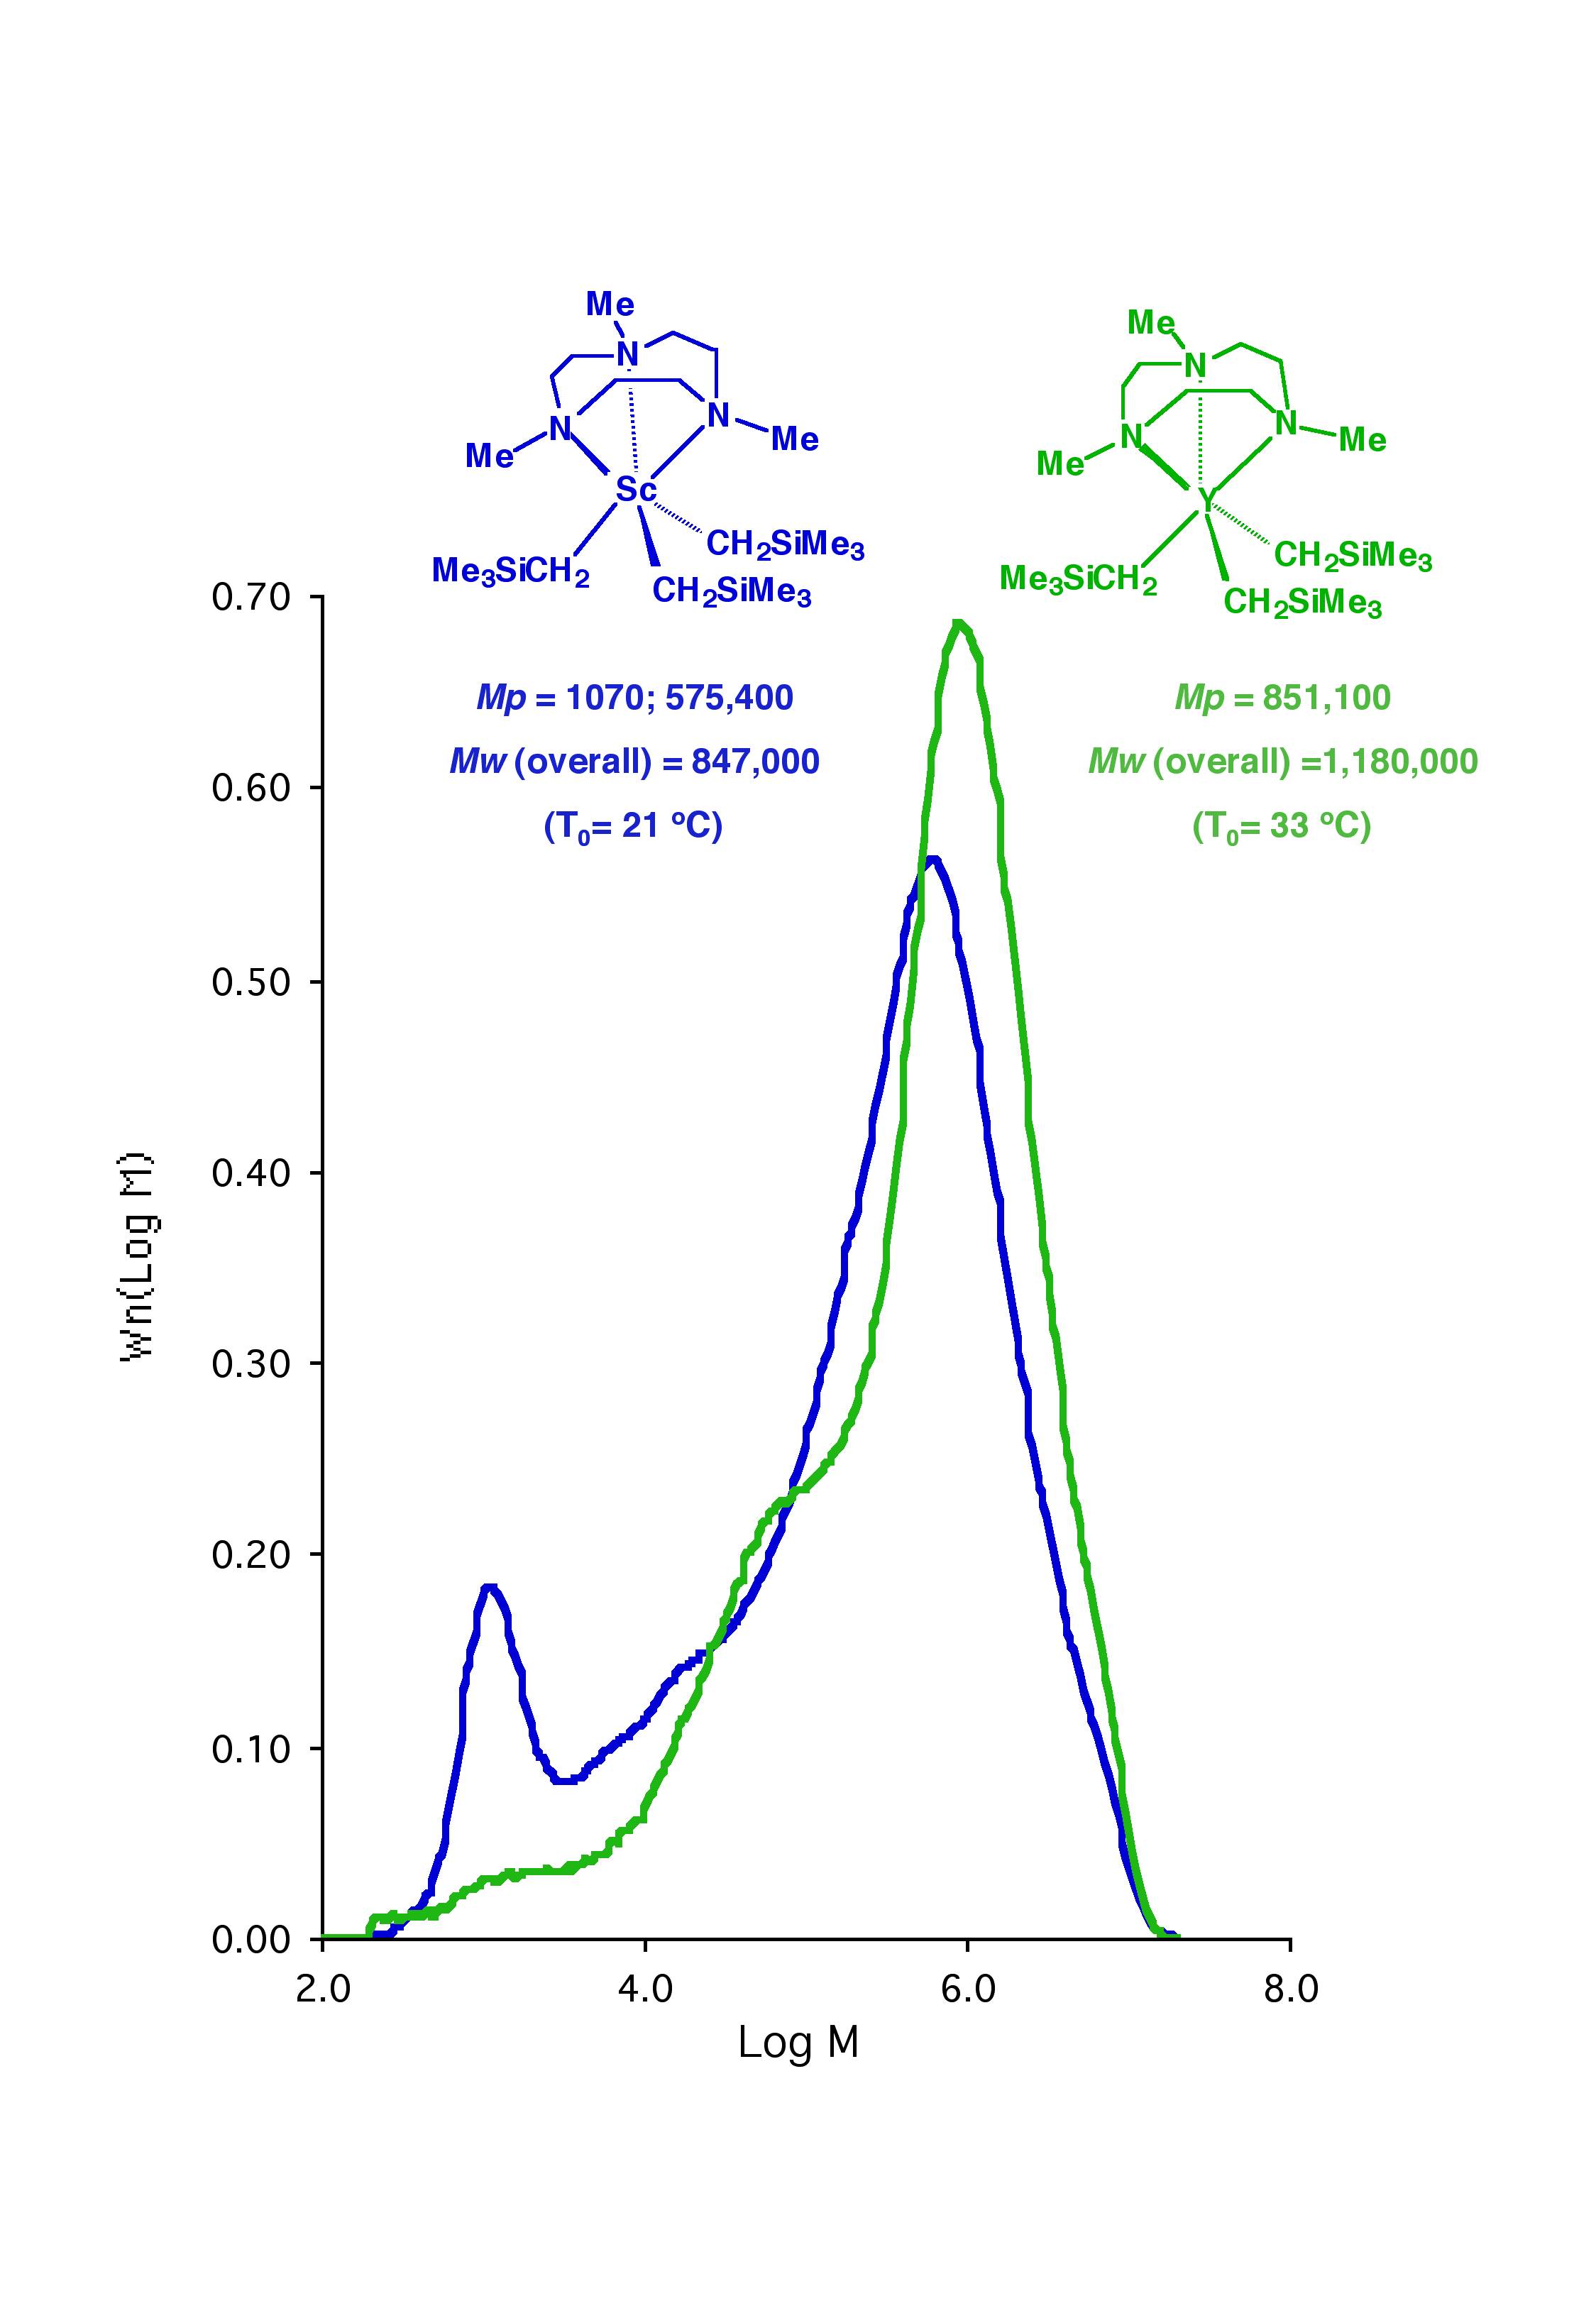


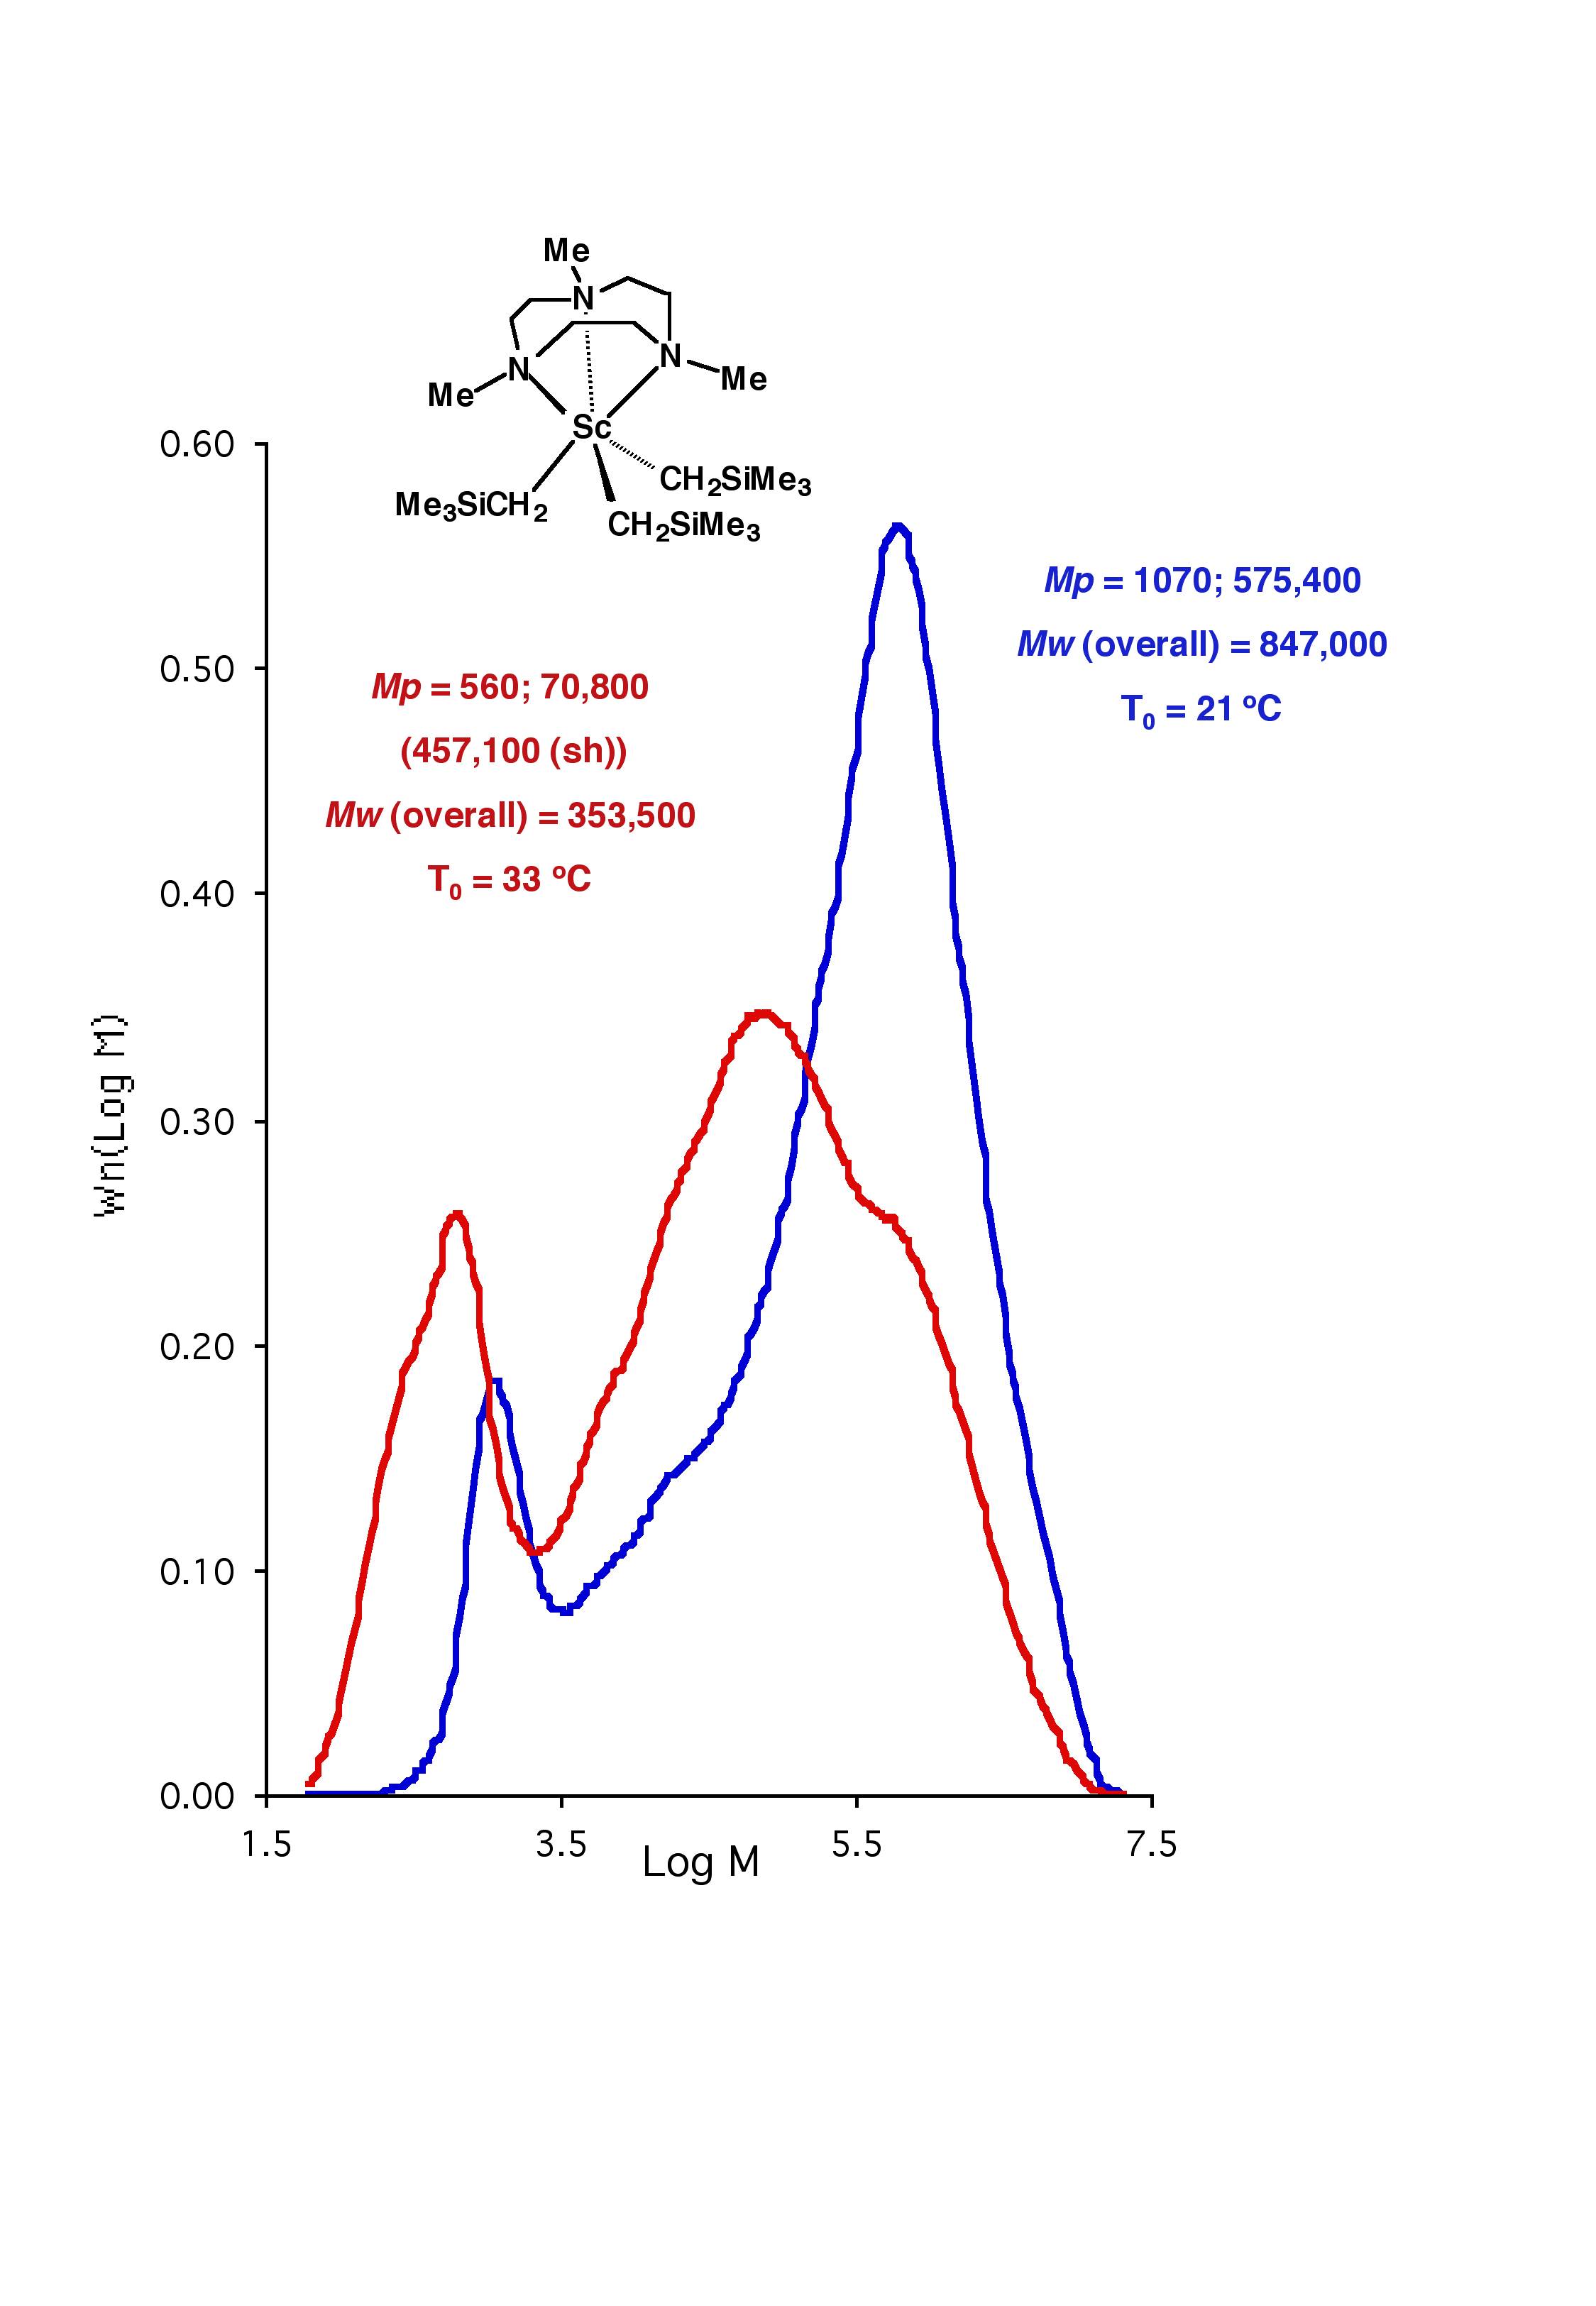

Supplement: b310867h.doc [file b310867h.doc]
